# Supplementary material for: A Novel Bead-Based Immunoassay for the Measurement of Heat Shock Proteins 27 and 70
Source: MDPI journal article supplement (doi:10.3390/pathogens9110863), 2020-10-22
Supplement: s1 [file s1]

A

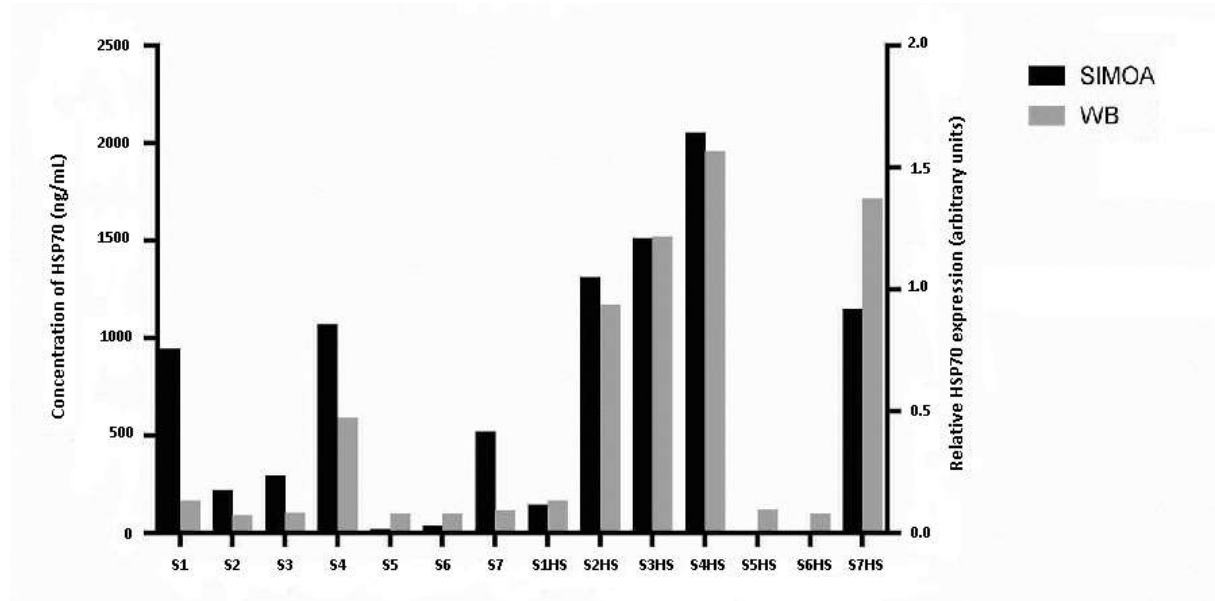

B

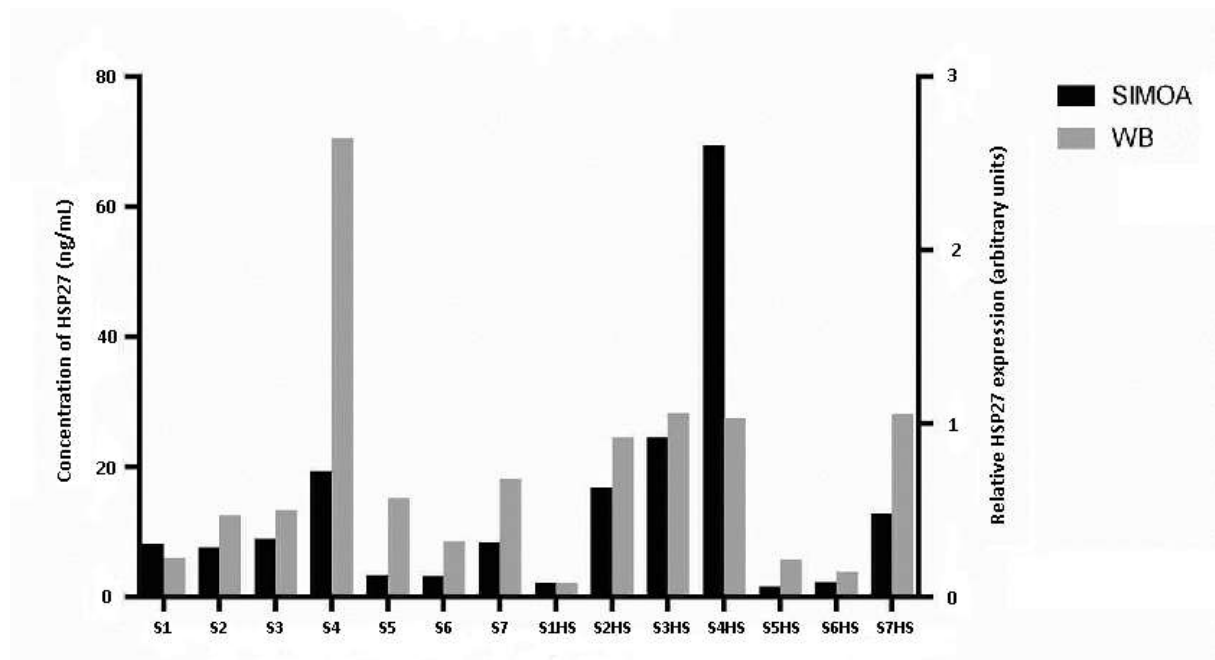

**Supplementary Figure 1.** Concentration of HSP70 and HSP27 using the newly developed SIMOA and Western blotting techniques.

Note. Left Y-axis: Concentration of HSP70 (A) and HSP27 (B) using the newly developed SIMOA technique. Right Y-axis: Signal intensity of Hsp70 (A) and HSP27 (B) relative to that of actin using Western blotting. S1, sample 1 unheated; S1HS, sample 1 heat shocked. The relative HSP expression obtained using Western blotting correlated significantly with HSP values using the present SIMOA technique: Spearman correlation test ( $r = 0,815$ ,  $p < 0.001$  and  $r = 0,895$ ,  $p < 0.001$  for HSP70 and HSP27, respectively).

**Supplementary Table 1.** Assay quality control summary using calibration diluent spiked with recombinant HSP27.

| Parameter                        | HSP27 Concentration (ng/mL) <sup>a</sup> |             |
|----------------------------------|------------------------------------------|-------------|
|                                  | High Control                             | Low Control |
| <b>Intra-Assay Means (n = 6)</b> |                                          |             |
| Assay 1                          | 580                                      | 160         |
| Assay 2                          | 599                                      | 168         |
| Assay 3                          | 576                                      | 132         |
| Assay 4                          | 555                                      | 143         |
| Intra-assay CV%                  |                                          |             |
|                                  | 6                                        | 4           |
|                                  | 14                                       | 3           |
|                                  | 4                                        | 13          |
|                                  | 9                                        | 6           |
| Inter-assay means (n = 4)        | 578                                      | 151         |
| Inter-assay CV%                  | 3                                        | 11          |

Note: Controls were prepared by spiking HSP27 peptide into calibration diluent at two different levels (500 and 125 ng/mL). HSP = Heat shock protein, SD = standard deviation, CV% = Percentage coefficient of variation. Spiked concentration; High (500 ng/mL), Low (125 ng/mL). <sup>a</sup>Concentrations were determined using the calibration curve from the runs.
